# Supplementary material
Source: Elsevier journal article supplement (http://authors.library.caltech.edu/records/k57mg-mbq97/files/mmc1.pdf)
Supplement: mmc1 [file mmc1.pdf]

**Table S1. Methodological Considerations of Major Clearing Protocols of the Last Decade, Related to Figures 1, 4, S1, and S5**

| Technique                                                                         | Clearing time for whole-brain | Complete transparency                                                                 | Fluorescent quenching                                                          | Tissues validated                                                                                                                              | Significant contribution to field                                                  | Drawback                                                                         |
|-----------------------------------------------------------------------------------|-------------------------------|---------------------------------------------------------------------------------------|--------------------------------------------------------------------------------|------------------------------------------------------------------------------------------------------------------------------------------------|------------------------------------------------------------------------------------|----------------------------------------------------------------------------------|
| <b>BABB, THF, DBE</b> (Becker et al., 2012; Dodt et al., 2007)                    | hours-days                    | Yes, but tissue shrinkage                                                             | Yes (Ertürk et al., 2012a; Ke et al., 2013)                                    | Rodent brain, spinal cord, peripheral tissues                                                                                                  | Among first clearing reagents                                                      | Harsh reagents (Ke et al., 2013)                                                 |
| <b>ClearT2</b> (Kuwajima et al., 2013)                                            | days                          | No                                                                                    | No-partial (Ke et al., 2013)                                                   | Rodent brain and embryo                                                                                                                        | Less quenching than BABB; novel reagents                                           | Immunolabeling only through 120 μm                                               |
| <b>Scale (A2, U2)</b> (Hama et al., 2011)                                         | weeks-months (slowest)        | Yes, but tissue swelling (Chung et al., 2013; Ke et al., 2013; Kuwajima et al., 2013) | No-minimal (Ke et al., 2013; Kuwajima et al., 2013)                            | Mouse brain, embryo (Hama et al., 2011)                                                                                                        | Transparency without quenching; IHC/F                                              | Slow; tissue deformation; potential protein loss with clearing (Ke et al., 2013) |
| <b>3DISCO</b> (Ertürk et al., 2012a; Ertürk and Bradke, 2013)                     | < week                        | Yes                                                                                   | No, but signal decay w/in days (Ertürk et al., 2012a; Ertürk and Bradke, 2013) | Peripheral/central organs, embryos, tumors (Ertürk and Bradke, 2013); Central (Ertürk et al., 2012b) and peripheral (Jung et al., 2014) nerves | Balance between rapidity and quality of cleared tissue; imaging protocol           | Requires immediate sample imaging; IHC-very limited                              |
| <b>CLARITY</b> (Chung and Deisseroth, 2013; Chung et al., 2013; Kim et al., 2013) | 10 days                       | Yes                                                                                   | No                                                                             | Rodent, human and non-human primate brains, spinal cord, zebrafish (Zhang et al., 2014)                                                        | Hydrogel-embedding; best tissue quality when performed correctly; IHC/F            | ETC difficult, customized equipment, expensive (Chung et al., 2013)              |
| <b>Advanced CLARITY</b> (Tomer et al., 2014; Zhang et al., 2014)                  | 3 weeks                       | Yes                                                                                   | No                                                                             | Whole mouse brain                                                                                                                              | No ETC – passive thermal CLARITY, COLM, CLARITY objectives, rapid imaging protocol | Requires COLM set-up                                                             |
| <b>SeeDB</b> (Ke et al., 2013; Ke and Imai, 2014)                                 | days (fastest)                | No                                                                                    | No                                                                             | Young rodent brains (Ke et al., 2013)                                                                                                          | No tissue deformation, fast                                                        | Tissue browning, incomplete clearing,                                            |
| <b>CUBIC</b> (Susaki et al., 2014)                                                | 2 weeks                       | Mostly-Yes                                                                            | No                                                                             | Rodent and non-human primate brain                                                                                                             | CUBIC informatics, optimized Scale (Susaki et al., 2014)                           | Brain only; potential protein loss during clearing                               |

|                                                                                                                                                                                                                                                                                                                                                                                                                                                                                                                                                                                                                                                                                                                                                                                                                                                                     |            |     |    |                                              |                                                                       |                    |
|---------------------------------------------------------------------------------------------------------------------------------------------------------------------------------------------------------------------------------------------------------------------------------------------------------------------------------------------------------------------------------------------------------------------------------------------------------------------------------------------------------------------------------------------------------------------------------------------------------------------------------------------------------------------------------------------------------------------------------------------------------------------------------------------------------------------------------------------------------------------|------------|-----|----|----------------------------------------------|-----------------------------------------------------------------------|--------------------|
| <b>PACT,<br/>PARS</b>                                                                                                                                                                                                                                                                                                                                                                                                                                                                                                                                                                                                                                                                                                                                                                                                                                               | days-weeks | Yes | No | All major rodent organs; whole-body clearing | optimized/simplified CLARITY; permits long-term tissue storage; IHC/F | Slower than 3DISCO |
| <p>IHC: Compatible with immunohistochemistry<br/> IHC/F: Compatible with immunohistochemistry, immunofluorescent labeling; validated for (&gt; 0.5 mm) depth of antibody penetration<br/> IHC: IHC-incompatible, IHC-unverified, or strong restrictions, such as only compatible with lipophilic tissue dyes, or poor antibody penetration (&lt;&lt; 0.5 mm)<br/> COLM: CLARITY-optimized light sheet microscopy; CLARITY objectives possess a several-millimeter working distance, which permits whole-brain or thick slice imaging. The COLM set-up grants rapid sample imaging and thus improves the throughput of whole-brain analysis. However, regardless of the imaging methodology followed: e.g. such as those provided in COLM, 3DISCO and CUBIC protocols, whole-brain and large sample imaging requires a specialized, expensive microscopy set-up.</p> |            |     |    |                                              |                                                                       |                    |
